# Supplementary material for: A diastereoselective carbocyclisation of allene-hydrazones through the intramolecular allylic transfer reaction
Source: Royal Society of Chemistry journal article supplement (doi:10.1039/b712856h), 2007-01-01

## Electronic Supplementary Information

### A diastereoselective carbocyclisation of allene-hydrazones through the intramolecular allylic transfer reaction

Sang-Hoon Kim, Seung-Ju Oh, Yurim Kim and Chan-Mo Yu\*

*BK-21 School of Chemical Materials Science and Department of Chemistry  
Sungkyunkwan University, Suwon 440-746, Korea*

**General.** All reactions were run in flame-dried glassware under an atmosphere of nitrogen. Dichloromethane was distilled from CaH<sub>2</sub> prior to use. All liquid reagents purchased from the Aldrich were distilled properly prior to use, unless otherwise indicated. Purification was conducted by flash column chromatography on silica gel (230-400 mesh), eluting with a mixture of hexane and ethyl acetate, unless otherwise stated. The reported yields are for chromatographically pure isolated products. FT-IR spectra were recorded on a Nicolet 320. <sup>1</sup>H NMR spectra were recorded on a Varian Unity Inova at 500 and/or 300 MHz in CDCl<sub>3</sub> as a solvent with TMS or residual chloroform as the internal standard. <sup>13</sup>C NMR spectra were measured on a Varian Unity Inova at 125 or 75 MHz in CDCl<sub>3</sub> as a solvent. X-ray data was collected with a Siemens P4 diffractometer equipped with a Mo X-ray tube at our departmental X-ray facility.

**Typical procedure: 2-[(3*S*\*,4*S*\*)-1-Tosyl-4-{1-(trimethylstannyl)vinyl}pyrrolidin-3-ylamino]isoindoline-1,3-dione (**7a**):** A flame-dried 20 mL Schlenk flask containing (π-allyl)<sub>2</sub>Pd<sub>2</sub>Cl<sub>2</sub> (3.42 mg, 0.0096 mmol) was charged with freshly distilled CH<sub>2</sub>Cl<sub>2</sub> (5 mL). After cooling to -40 °C, a solution of **6a** (0.130 g, 0.317 mmol) and hexamethyldistannane (0.115 g, 0.35 mmol) in CH<sub>2</sub>Cl<sub>2</sub> (1.5 mL) was added over 20 min while keeping the temperature below -40 °C, and then stirred for 3 h at -40 °C (reaction progress was monitored by TLC). After cooling to -78 °C, a pre-cooled solution of TiCl<sub>4</sub> (1.2 mL, 0.36 mmol, freshly prepared 0.3 M in CH<sub>2</sub>Cl<sub>2</sub>) at -78 °C was added in one portion via a cannular needle. The reaction mixture was allowed to proceed for 2 h at -78 °C, and

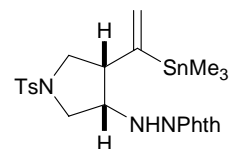

then quenched by the addition of aqueous saturated NaHCO<sub>3</sub> solution (pH 7, 7 mL). The aqueous layer was extracted with CH<sub>2</sub>Cl<sub>2</sub> (ca 10 mL x 2). The combined organic extracts were washed with saturated brine (1x), dried over anhydrous Na<sub>2</sub>SO<sub>4</sub>, filtered, and concentrated under reduced pressure to give the crude product. Final purification was effected by SiO<sub>2</sub> chromatography (Hexanes:EtOAc = 5:1) to afford **7a** (0.151 g, 0.263 mmol, 83%) as a colorless liquid then solidify in the freezer. TLC, R<sub>f</sub> 0.48 (2:1 hexane/EtOAc); IR (film) 3046, 2977, 1722, 1599, 1443, 1368, 1096, 665 cm<sup>-1</sup>; <sup>1</sup>H NMR (500MHz, CDCl<sub>3</sub>) δ 0.12 (s, 9H), 2.44 (s, 3H), 2.85-2.87 (m, 1H), 3.12 (dd, *J* = 9.9, 8.4 Hz, 1H), 3.18 (dd, *J* = 9.3, 7.0 Hz, 1H), 3.54 (dd, *J* = 9.9, 8.4 Hz, 1H), 3.55-3.59 (m, 2H), 4.52 (d, *J* = 3.1 Hz, 1H), 5.25 (s, 1H), 5.80 (s, 1H), 7.33 (d, *J* = 8.4 Hz, 2H), 7.71 (d, *J* = 8.4 Hz, 2H), 7.75 (dd, *J* = 5.3, 3.1 Hz, 2H), 7.84 (dd, *J* = 5.3, 3.1 Hz, 2H); <sup>13</sup>C NMR (125MHz, CDCl<sub>3</sub>) δ -8.3, 15.5, 21.8, 52.2, 54.0, 62.3, 123.8, 127.9, 128.9, 130.0, 130.2, 133.5, 134.7, 144.0, 152.7, 166.7; Anal. Calcd for C<sub>24</sub>H<sub>29</sub>N<sub>3</sub>O<sub>4</sub>SSn: C, 50.19; H, 5.09; N, 7.32; S, 5.58. Found: C, 49.91; H, 4.88; N, 7.44; S, 5.63.

**2-[(3*S*\*,4*R*\*)-4-{1-(Trimethylstannyl)vinyl}-tetrahydrofuran-3-ylamino]-**

**isoindoline-1,3-dione (7b):** TLC, R<sub>f</sub> 0.49 (2:1 hexane/EtOAc); IR

(neat) 3045, 2982, 1719, 1589, 1447, 1375, 1122, 1095, 668 cm<sup>-1</sup>;

<sup>1</sup>H NMR (500MHz, CDCl<sub>3</sub>) δ 0.28 (s, 9H), 3.28-3.29 (m, 1H), 3.80-3.83 (m, 1H), 3.89-3.91 (m, 1H), 3.95-4.00 (m, 2H), 4.16 (dd, *J* = 8.2,

8.2 Hz, 1H), 4.48 (s, 1H), 5.57 (s, 1H), 6.02 (s, 1H), 7.73 (dd, *J* = 5.6, 3.1 Hz, 2H), 7.84 (dd, *J* = 5.6, 3.1 Hz, 2H). <sup>13</sup>C NMR (125MHz, CDCl<sub>3</sub>) δ -8.3, 52.1, 61.3, 70.4, 72.7,

123.7, 129.7, 130.5, 134.5, 150.4, 167.1; HRMS (EI): calcd. for C<sub>17</sub>H<sub>22</sub>N<sub>2</sub>O<sub>3</sub>Sn:

422.0652. Found 426.0644.

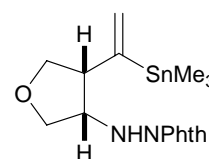

**(3*R*\*,4*S*\*)-Diethyl 3-(1,3-dioxoisoindolin-2-ylamino)-4-{1-(trimethylstannyl)vinyl}-**

**cyclopentane-1,1-dicarboxylate (7c):** TLC, R<sub>f</sub> 0.49 (2:1

hexane/EtOAc); IR (film) 3051, 2970, 1738, 1720, 1595, 1450,

1376, 1225, 1129, 1096, 664 cm<sup>-1</sup>; <sup>1</sup>H NMR (500MHz, CDCl<sub>3</sub>)

δ 0.26 (s, 9H), 1.31 (t, *J* = 7.0 Hz, 6H), 2.13-2.17 (m, 1H), 2.50

(ddd, *J* = 12.9, 5.1, 1.7 Hz, 1H), 3.03-3.07 (m, 2H), 3.80 (s, 1H), 4.15 (q, *J* = 7.0 Hz, 4H), 5.54 (s, 1H), 6.05 (s, 1H), 7.71 (dd, *J* = 5.3, 3.1 Hz, 2H), 7.82 (dd, *J* = 5.3, 3.1 Hz,

2H); <sup>13</sup>C NMR (125MHz, CDCl<sub>3</sub>) δ -8.5, 14.2, 35.4, 38.2, 51.6, 53.6, 60.7, 61.9, 123.5, 128.3, 130.6, 134.4, 151.9, 167.2, 171.9, 173.4; Calcd for C<sub>24</sub>H<sub>32</sub>N<sub>2</sub>O<sub>6</sub>Sn: C, 51.18; H,

5.73; N, 4.97. Found: C, 51.33; H, 5.88; N, 4.69.

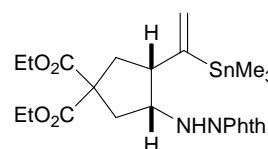

**2-[(1*R*\*,2*S*\*)-2-{1-(Trimethylstannyl)vinyl}cyclopentylamino]isoindoline-1,3-dione**

(**7d**): TLC, *R<sub>f</sub>* 0.31 (3:1 hexane/EtOAc); IR (film) 3037, 2989, 1721, 1592, 1444, 1377, 1094, 664 cm<sup>-1</sup>; <sup>1</sup>H NMR (500MHz, CDCl<sub>3</sub>) δ 0.13 (s, 9H), 1.40-1.48 (m, 1H), 1.63-1.73 (m, 2H), 1.77-1.89 (m, 2H), 1.90-2.17 (m, 1H), 2.72 (dd, *J* = 11.0, 8.0 Hz, 1H), 3.55-3.59 (m, 1H), 4.64 (s, 1H), 5.10 (s, 1H), 5.78 (s, 1H), 7.72 (dd, *J* = 5.3, 3.1 Hz, 2H), 7.83 (dd, *J* = 5.3, 3.1 Hz, 2H); <sup>13</sup>C NMR (125MHz, CDCl<sub>3</sub>) δ -8.2, 22.5, 31.1, 33.1, 56.8, 64.4, 123.6, 125.5, 130.5, 134.4, 158.0, 167.2; Anal. Calcd for C<sub>18</sub>H<sub>24</sub>N<sub>2</sub>O<sub>2</sub>Sn: C, 51.58; H, 5.77; N, 6.68. Found: C, 51.32; H, 5.89; N, 6.53.

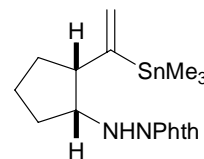

**2-[(3*S*\*,4*R*\*)-5-methyl-1-tosyl-4-{1-(trimethylstannyl)vinyl}pyrrolidin-3-ylamino]-**

**isoindoline-1,3-dione (7e)**: TLC, *R<sub>f</sub>* 0.29 (2:1 hexane/EtOAc); IR (film) 3048, 2968, 1728, 1595, 1451, 1369, 1091, 665 cm<sup>-1</sup>; <sup>1</sup>H NMR (500MHz, CDCl<sub>3</sub>) δ 0.041 (s, 9H), 1.33 (d, *J* = 6.0 Hz, 3H), 2.42 (s, 3H), 2.64 (dd, *J* = 10.0, 10.0 Hz 1H), 3.27-3.37 (m, 2H), 3.41 (dd, *J* = 10.8, 9.0 Hz, 1H), 3.73 (dd, *J* = 10.8, 7.5 Hz, 1H), 4.56 (s, 1H), 5.30 (d, *J* = 2.0 Hz, 1H), 5.82 (d, *J* = 2.0 Hz, 1H), 7.29 (d, *J* = 8.0 Hz, 2H), 7.67 (d, *J* = 8.0 Hz, 2H), 7.75 (dd, *J* = 5.5, 3.0 Hz, 2H), 7.84 (dd, *J* = 5.5, 3.0 Hz, 2H); <sup>13</sup>C NMR (125MHz, CDCl<sub>3</sub>) δ -8.21, 19.9, 21.7, 52.9, 60.4, 60.6, 64.6, 123.8, 127.6, 130.0, 130.2, 131.3, 134.7, 135.7, 143.8, 152.4, 166.6; Anal. Calcd for C<sub>25</sub>H<sub>31</sub>N<sub>3</sub>O<sub>4</sub>SSn: C, 51.04; H, 5.31; N, 7.14; S, 5.45. Found: C, 52.75; H, 5.44; N, 7.01; S, 5.29.

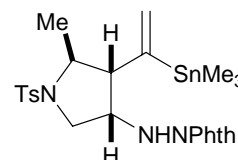

**2-[(3*S*\*,4*R*\*)-5-Phenethyl-1-tosyl-4-{1-(trimethylstannyl)vinyl}pyrrolidin-3-**

**ylamino]isoindoline-1,3-dione (7f)**: TLC, *R<sub>f</sub>* 0.31 (2:1 hexane/EtOAc); IR (film) 3047, 2763, 1727, 1592, 1452, 1368, 1095, 664 cm<sup>-1</sup>; <sup>1</sup>H NMR (500MHz, CDCl<sub>3</sub>) δ 0.06 (s, 9H), 1.87-1.94 (m, 1H), 2.16-2.23 (m, 1H), 2.61 (dd, *J* = 12.8, 5.5 Hz, 1H), 2.80 (dd, *J* = 12.8, 4.5 Hz, 1H), 2.95 (dd, *J* = 9.5, 9.5 Hz, 1H), 3.26-3.31 (m, 1H), 3.39 (dd, *J* = 11.0, 9.5 Hz, 1H), 3.56 (ddd, *J* = 9.5, 6.5, 2.5 Hz, 1H), 3.81 (dd, *J* = 11.0, 7.0 Hz, 1H), 4.60 (s, 1H), 5.33 (d, *J* = 2.0 Hz, 1H), 5.83 (d, *J* = 2.0 Hz, 1H), 7.14-7.19 (m, 4H), 7.25-7.29 (m, 3H), 7.67 (d, *J* = 8.5 Hz, 2H), 7.76 (dd, *J* = 5.5, 3.0 Hz, 2H), 7.85 (dd, *J* = 5.5, 3.0 Hz, 2H); <sup>13</sup>C NMR (125MHz, CDCl<sub>3</sub>) δ -8.16, 21.7, 30.2, 34.5, 53.4, 60.7, 61.3, 63.5, 123.9, 126.0, 127.6, 128.6, 128.7, 130.1, 130.2, 131.1, 134.7, 135.9, 142.1, 143.9, 153.3, 166.6; Anal. Calcd for C<sub>32</sub>H<sub>37</sub>N<sub>3</sub>O<sub>4</sub>SSn: C, 56.65; H, 5.50; N, 6.19; S, 4.73. Found: C, 56.70; H, 5.52; N, 6.12; S, 4.71.

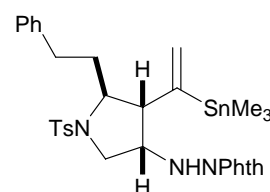

**2-[(3*S*\*,4*S*\*)-3-methyl-1-tosyl-4-{1-(trimethylstannyl)vinyl}pyrrolidin-3-ylamino]-**

**isoindoline-1,3-dione (7g):** TLC, *R<sub>f</sub>* 0.38 (2:1 hexane/EtOAc); IR

(neat) 3053, 2974, 1725, 1596, 1448, 1376, 1098, 662  $\text{cm}^{-1}$ ;  $^1\text{H}$

NMR (300MHz,  $\text{CDCl}_3$ )  $\delta$  1.16 (s, 9H), 0.94 (s, 3H), 2.41 (s, 3H),

2.98 (dd,  $J = 8.1, 8.1$  Hz, 1H), 3.24 (d,  $J = 10.5$  Hz, 1H), 3.35 (dd,

$J = 8.1, 8.1$  Hz, 1H), 3.42 (d,  $J = 10.5$  Hz 1H), 3.68 (dd,  $J = 8.1,$

8.1 Hz, 1H), 4.44 (s, 1H), 5.42 (s, 1H), 5.81 (s, 1H), 7.32 (d,  $J = 8.1$  Hz, 2H), 7.73-7.65

(m, 6H);  $^{13}\text{C}$  NMR (75MHz,  $\text{CDCl}_3$ )  $\delta$  -7.36, 19.5, 21.8, 51.6, 55.0, 58.9, 67.6, 123.8,

127.9, 130.0, 130.2, 130.4, 133.8, 134.8, 143.8, 151.6, 167.4; Anal. Calcd for

$\text{C}_{25}\text{H}_{31}\text{N}_3\text{O}_4\text{SSn}$ : C, 51.04; H, 5.31; N, 7.14; S, 5.45. Found: C, 51.23; H, 5.57; N, 6.96;

S, 5.33.

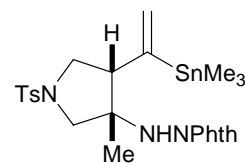

## Copies of $^1\text{H}$ NMR and $^{13}\text{C}$ NMR spectra for all products and NOE spectra of 7a and 7g

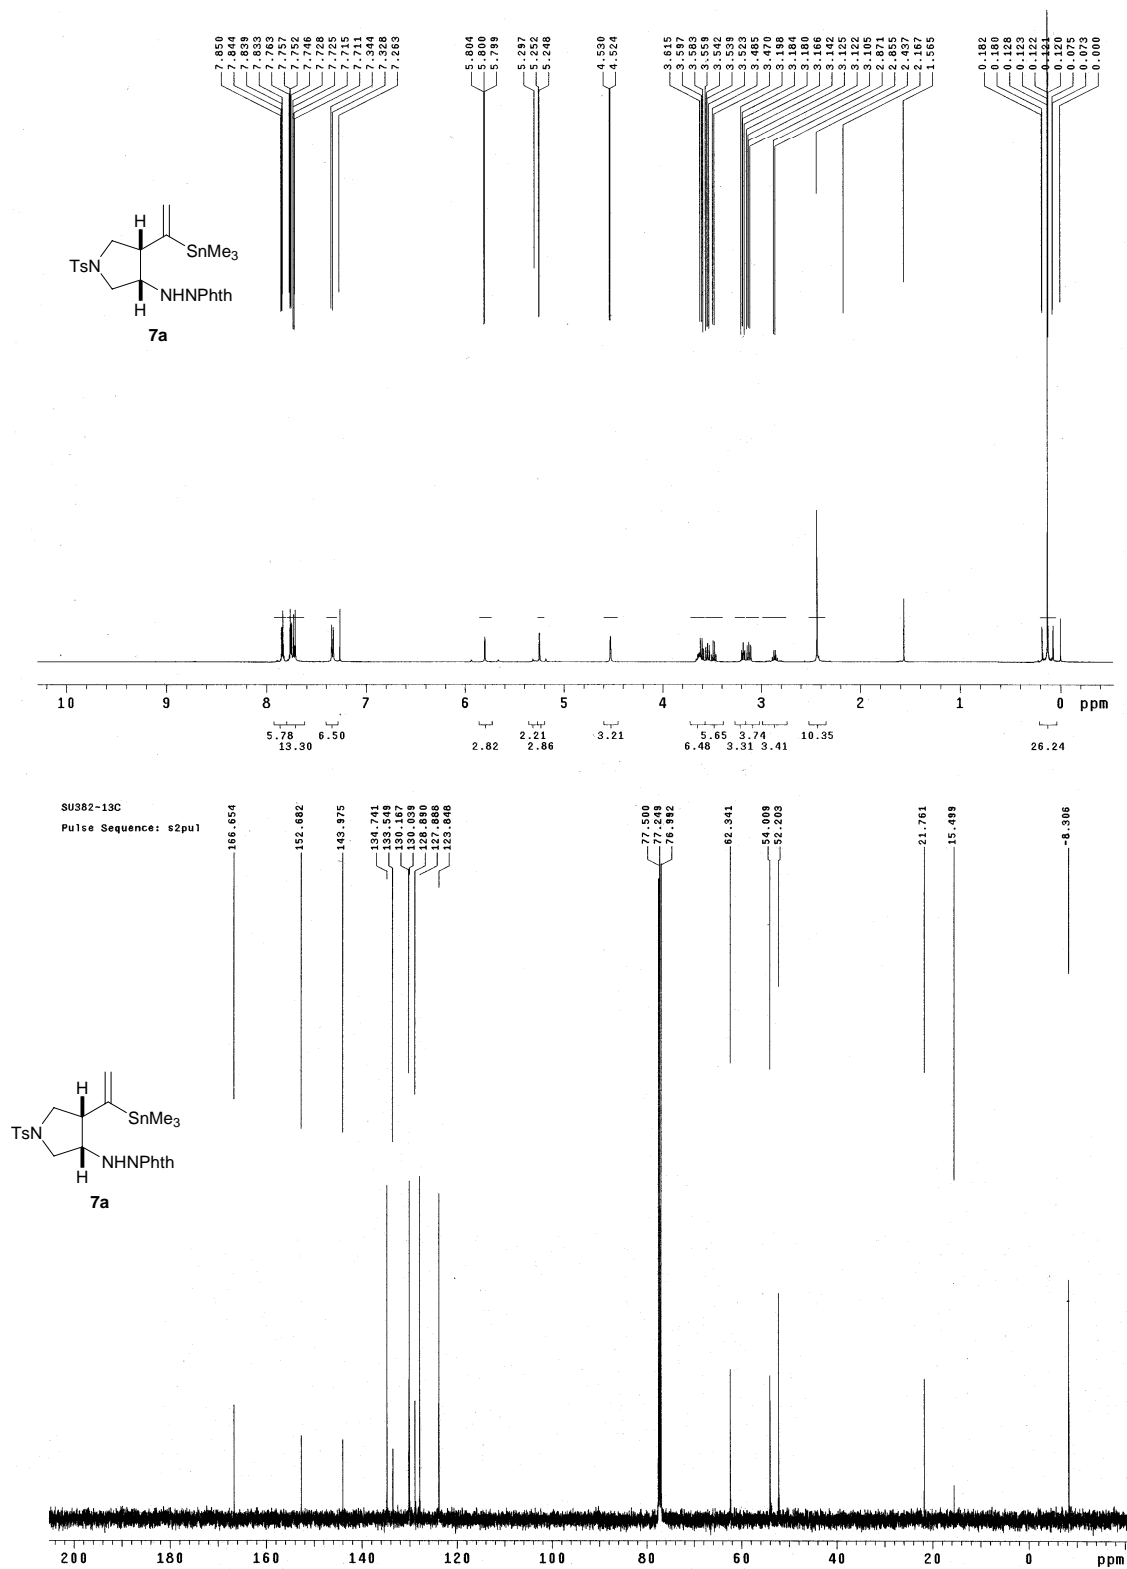

## NOE experiments for the compound 7a

### -Conformations

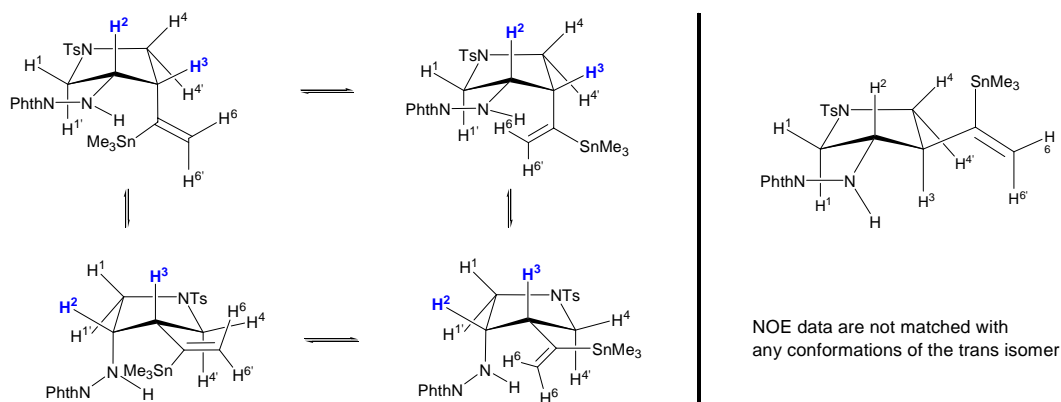

### -NOE spectra

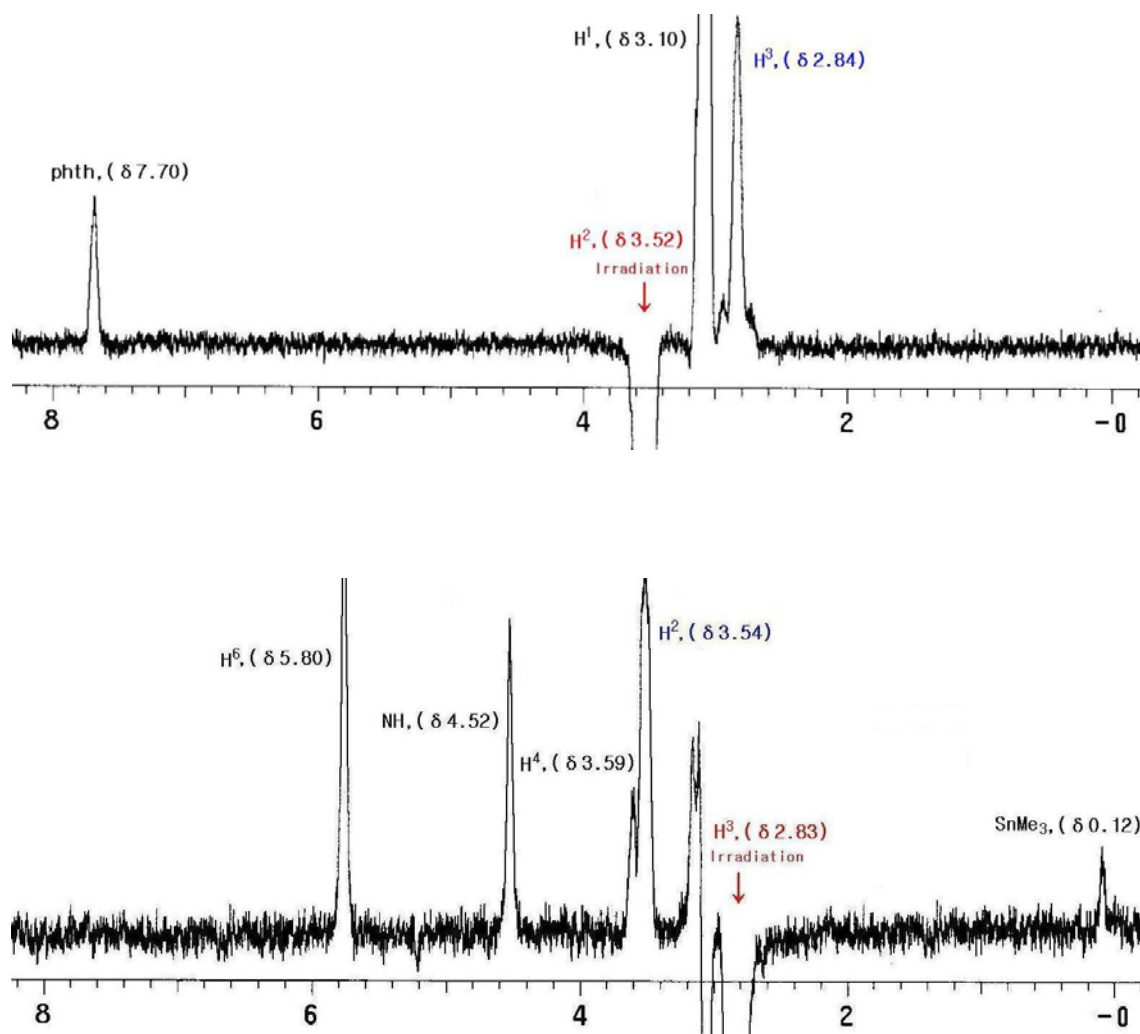

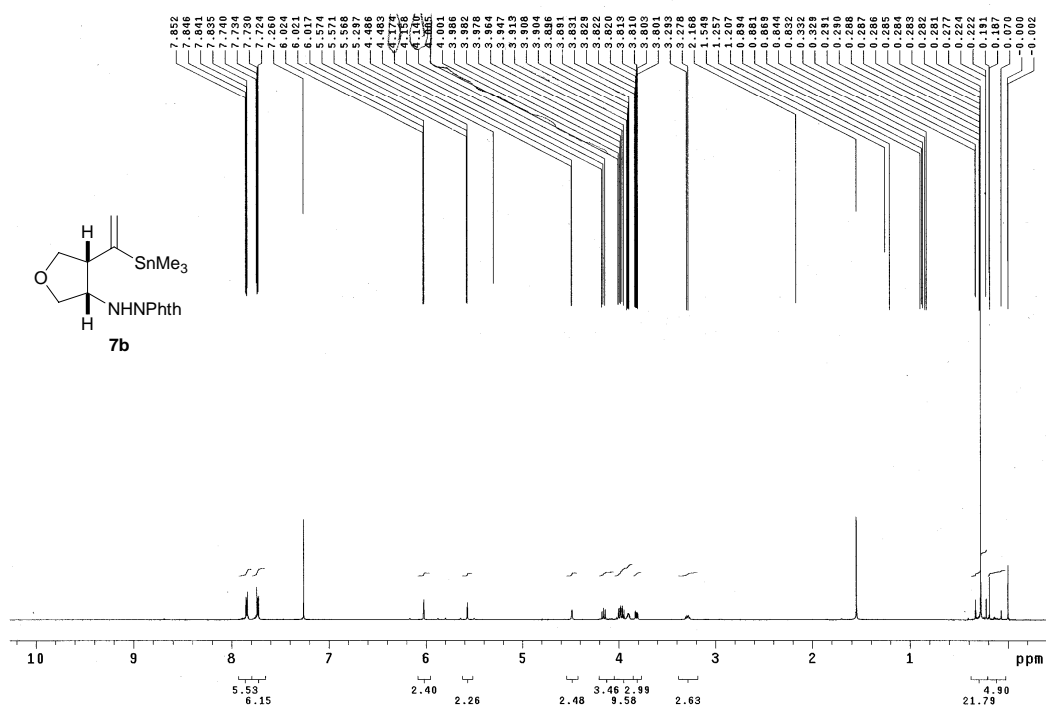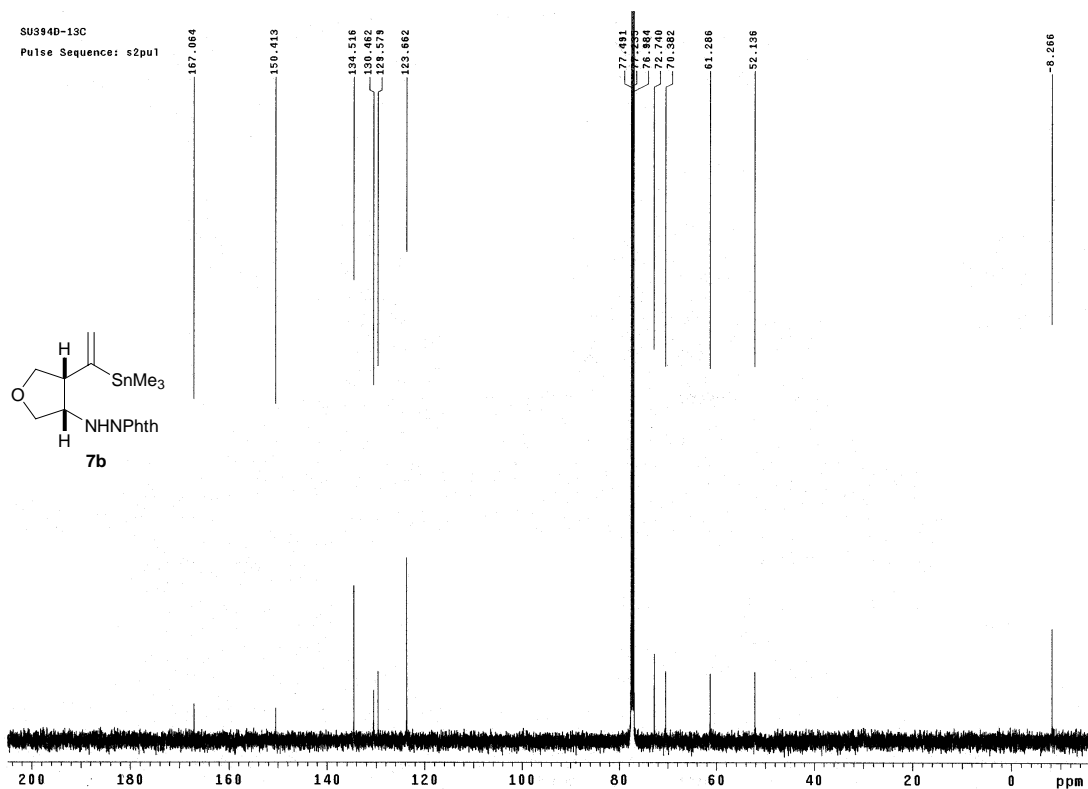





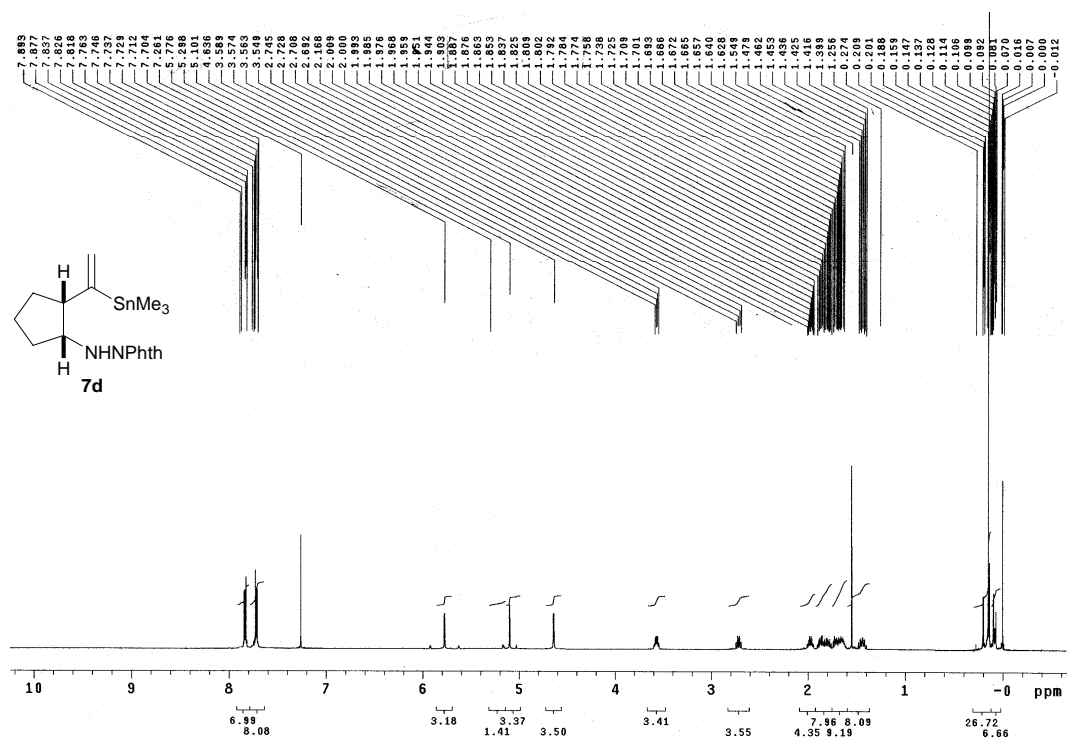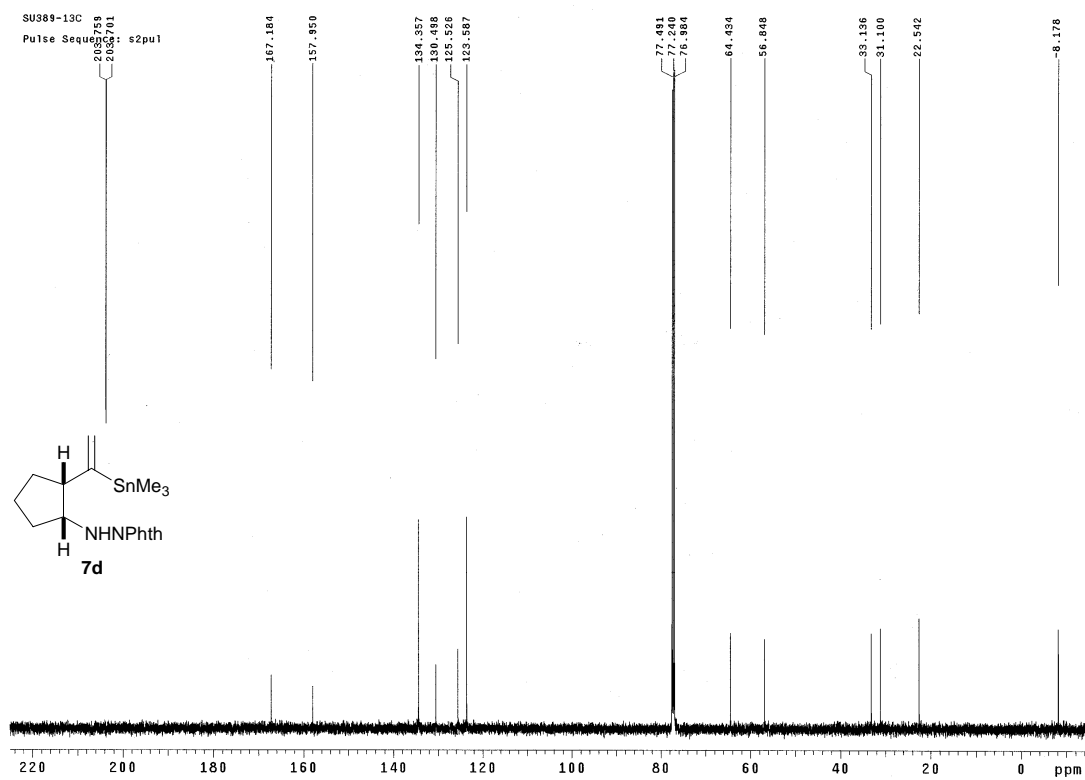





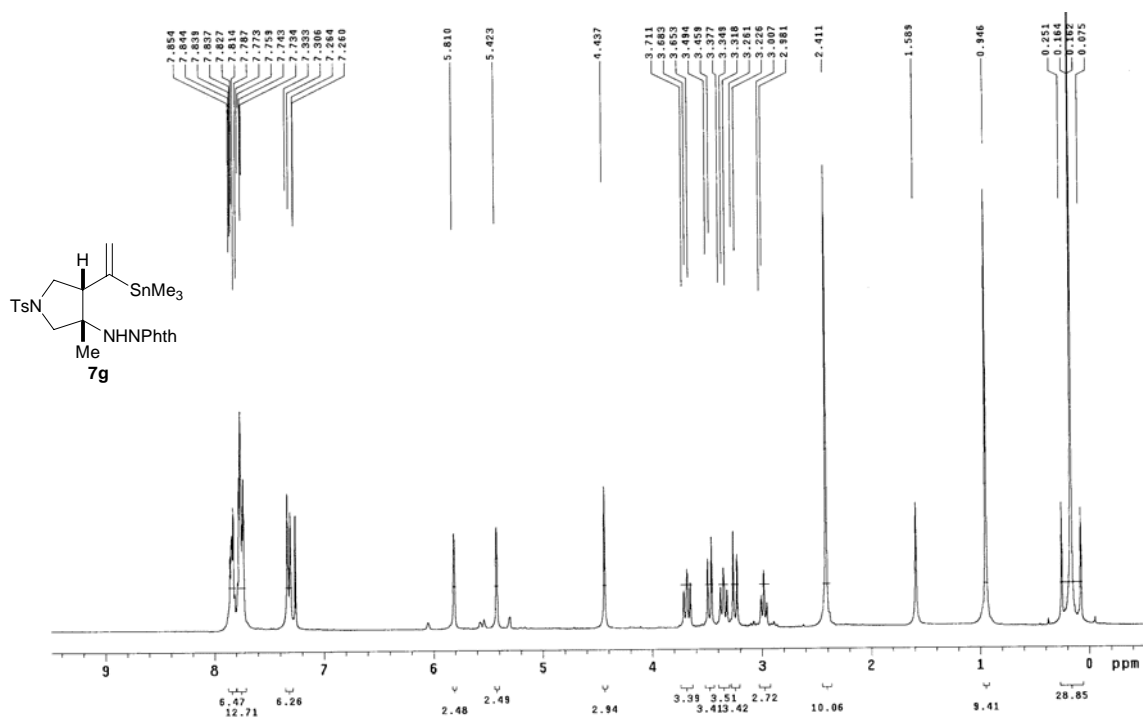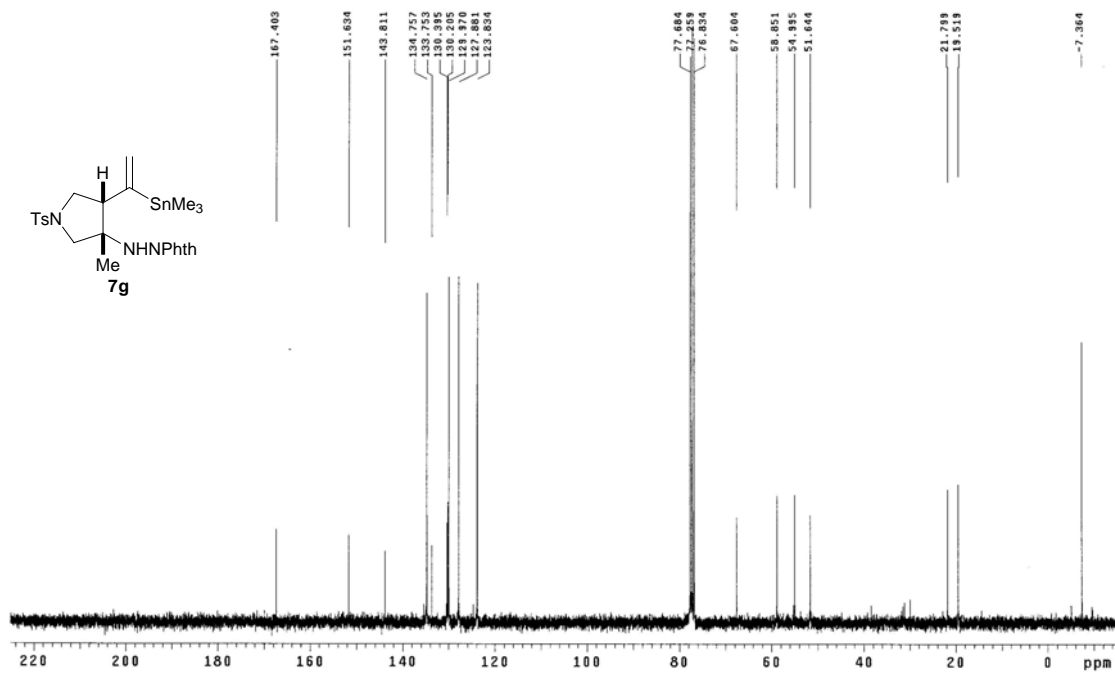

## NOE experiments for the compound 7g

### -Conformations

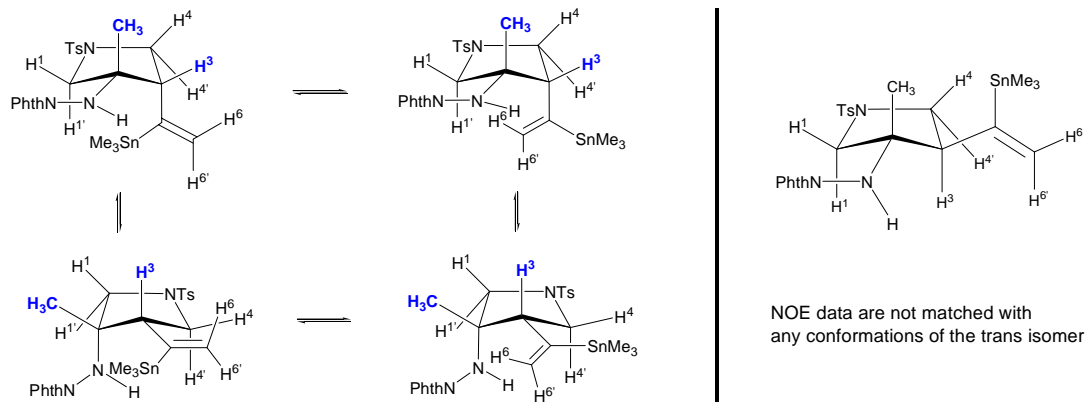

### -NOE spectra

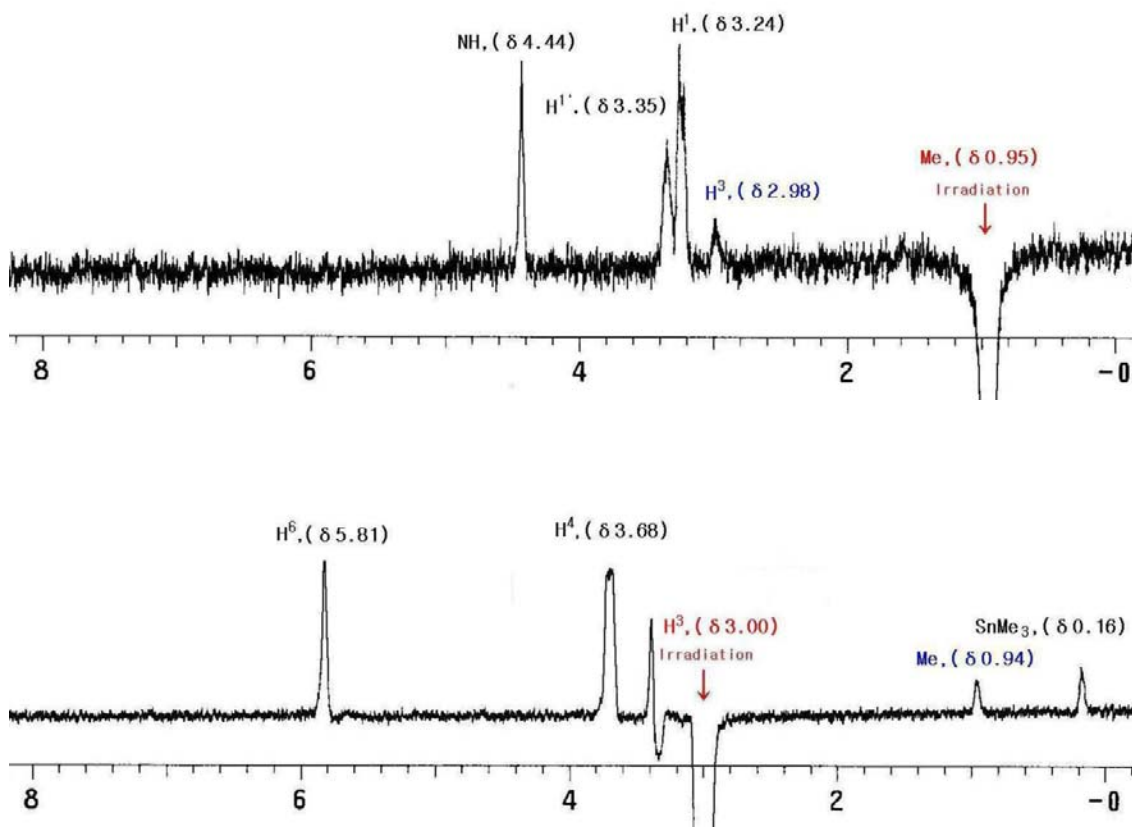

Supplement: b712856h.pdf [file b712856h.pdf]
